# Supplementary material for: Dual Targeting of Bromodomain and Extraterminal Domain Proteins, and WNT or MAPK Signaling, Inhibits c-MYC Expression and Proliferation of Colorectal Cancer Cells
Source: Oxford University Press journal article supplement (doi:10.1158/1535-7163.mct-15-0724), 2016-03-16
Supplement: 15357163mct150724-sup-154888_2_supp_3366476_j2s6sv.docx [file 15357163mct150724-sup-154888_2_supp_3366476_j2s6sv.docx]

**Supplementary Table 2**. Genotypes of colon cancer cell lines.

| **Cell line** | **GI50** | **MSI/MSS** | **CIMP** | ***KRAS*** | ***BRAF*** | ***TP53*** | ***PIK3CA*** | ***PTEN*** | ***APC*** | ***CTNNB1*** |
| --- | --- | --- | --- | --- | --- | --- | --- | --- | --- | --- |
| GP5D | 19.8 | MSI | CIMP- | mut | mut | wt | mut | Mut | mut | wt |
| HT29 | 22.1 | MSS | CIMP+ | wt | mut | mut | mut | wt | mut | wt |
| LIM1215 | 92.7 | MSI | CIMP- | wt | wt | wt | wt | wt | wt | mut |
| Co115 | 97.1 | MSI | CIMP+ | wt | mut | wt | wt | null | Unk | Unk |
| LIM2405 | 184.9 | MSI | CIMP+ | wt | mut | wt | wt | null | mut | wt |
| HCA7 | 224.9 | MSI | CIMP+ | wt | wt | mut | wt | wt | mut | wt |
| Caco2 | 253.5 | MSS | CIMP- | wt | wt | mut | wt | wt | mut | mut |
| RKO | 272.9 | MSI | CIMP+ | wt | mut | wt | mut | wt | wt | mut |
| SW48 | 405.5 | MSI | CIMP+ | wt | wt | wt | mut | wt | mut | mut |
| HCC2998 | 416.9 | MSS | CIMP- | mut | wt | mut | wt | wt | mut | wt |
| HCT116 | 452.9 | MSI | CIMP+ | mut | wt | wt | mut | wt | wt | mut |
| LoVo | 498.9 | MSI | CIMP- | mut | wt | wt | wt | wt | mut | wt |
| Colo205 | 516.4 | MSS | CIMP+ | wt | mut | mut | wt | wt | mut | wt |
| Colo320 | 673.0 | MSS | CIMP- | wt | wt | mut | wt | wt | mut | wt |
| DiFi | 709.6 | MSS | CIMP- | wt | wt | Unk | Wt | Wt | mut | Unk |
| SKCO1 | 756.8 | MSS | CIMP+ | mut | wt | wt | wt | wt | mut | wt |
| SW948 | 756.8 | MSS | CIMP- | mut | wt | mut | mut | wt | mut | wt |
| KM12 | 966.1 | MSI | CIMP+ | wt | mut | mut | wt | null | mut | wt |
| SW480 | 1303.2 | MSS | CIMP- | mut | wt | mut | wt | wt | mut | wt |
| HuTu80 | 1367.7 | MSS | CIMP- | wt | wt | wt | wt | wt | wt | wt |
