# Supplementary material for: Dual Targeting of Bromodomain and Extraterminal Domain Proteins, and WNT or MAPK Signaling, Inhibits c-MYC Expression and Proliferation of Colorectal Cancer Cells
Source: Oxford University Press journal article supplement (doi:10.1158/1535-7163.mct-15-0724), 2016-03-16
Supplement: 15357163mct150724-sup-154888_2_supp_3366487_r2s6t0.docx [file 15357163mct150724-sup-154888_2_supp_3366487_r2s6t0.docx]

**Supplementary Figure Legends.**

**Supplementary Figure 1.** Basal BRD2, 3 and 4 protein expression in 20 CRC cell lines.

**Supplementary Figure 2.** BRD2, 3 and 4 protein expression determined by IHC in 5 primary CRC’s.

**Supplementary Figure 3.** Biomarkers of response to JQ1 in CRC lines. Cell lines dichotomized according to microsatellite instability (MSI) status, CpG island methylator phenotype (CIMP status), *TP53, KRAS/BRAF* or *PIK3CA/PTEN* mutation status, and *c-MYC* gene amplification status. Box and Whiskers plots are of maximum and minimum values and groups were compared using a Mann-Whitney test. Bottom panels show the correlation between BRD2, 3 and 4 protein expression computed from densitometric analysis of the western blots shown in Supplementary Figure 1 and JQ1 response.

**Supplementary Figure 4.** Basal MYC (A) mRNA and (B) protein expression in 20 CRC cell lines. Correlation of c-MYC (C) mRNA and (D) protein with JQ1 response.
